# Supplementary material
Source: HighWire-hosted journal article supplement (https://bmjopen.bmj.com/content/12/2/e055664)
Supplement: inline-supplementary-material-4 [file inline-supplementary-material-4.pdf]

**Supplementary material 4. Research ethics committee approvals**

The study protocol and procedures were approved by:

1. Children's Hospital of Eastern Ontario Research Ethics Board (ID #1955), covering the following sites:
  - a. Children's Hospital of Eastern Ontario, Ottawa, ON, Canada
  - b. The Hospital for Sick Children, Toronto, ON, Canada
  - c. London Health Sciences Centre, London, ON, Canada
  - d. Kingston Health Sciences Centre, Kingston, ON, Canada
  - e. Hamilton Health Sciences, Hamilton, ON, Canada
2. The University of Ottawa Research Ethics Board (File no. H-04-20-5757)
3. University of Calgary Conjoint Health Research Ethics Board (ID no. REB20-2225)
4. University of British Columbia C&W Research Ethics Board (No. H20-00673)
5. University of Alberta Research Ethics Board (ID no. MS3\_Pro00098519)
6. Izaak Walton Killam Research Ethics Board (Project # 1025806)
7. McGill University Health Centre Research Ethics Board (No.13-331-PED (CIMDRN) / 2021-7171)
8. University of Manitoba Health Research Ethics Board (Ethics # HS24028 (H2020:291))
